# Supplementary material for: A structural blueprint for interleukin-21 signal modulation
Source: PubMed Central journal article supplement (PMC10320830; doi:10.1016/j.celrep.2023.112657), 2023-06-19
Supplement: mmc1.pdf [file mmc1.pdf]

**Cell Reports, Volume 42**

**Supplemental information**

**A structural blueprint for interleukin-21**

**signal modulation**

**Gita C. Abhiraman, Theodora U.J. Bruun, Nathanael A. Caveney, Leon L. Su, Robert A. Saxton, Qian Yin, Shaogeng Tang, Mark M. Davis, Kevin M. Jude, and K. Christopher Garcia**

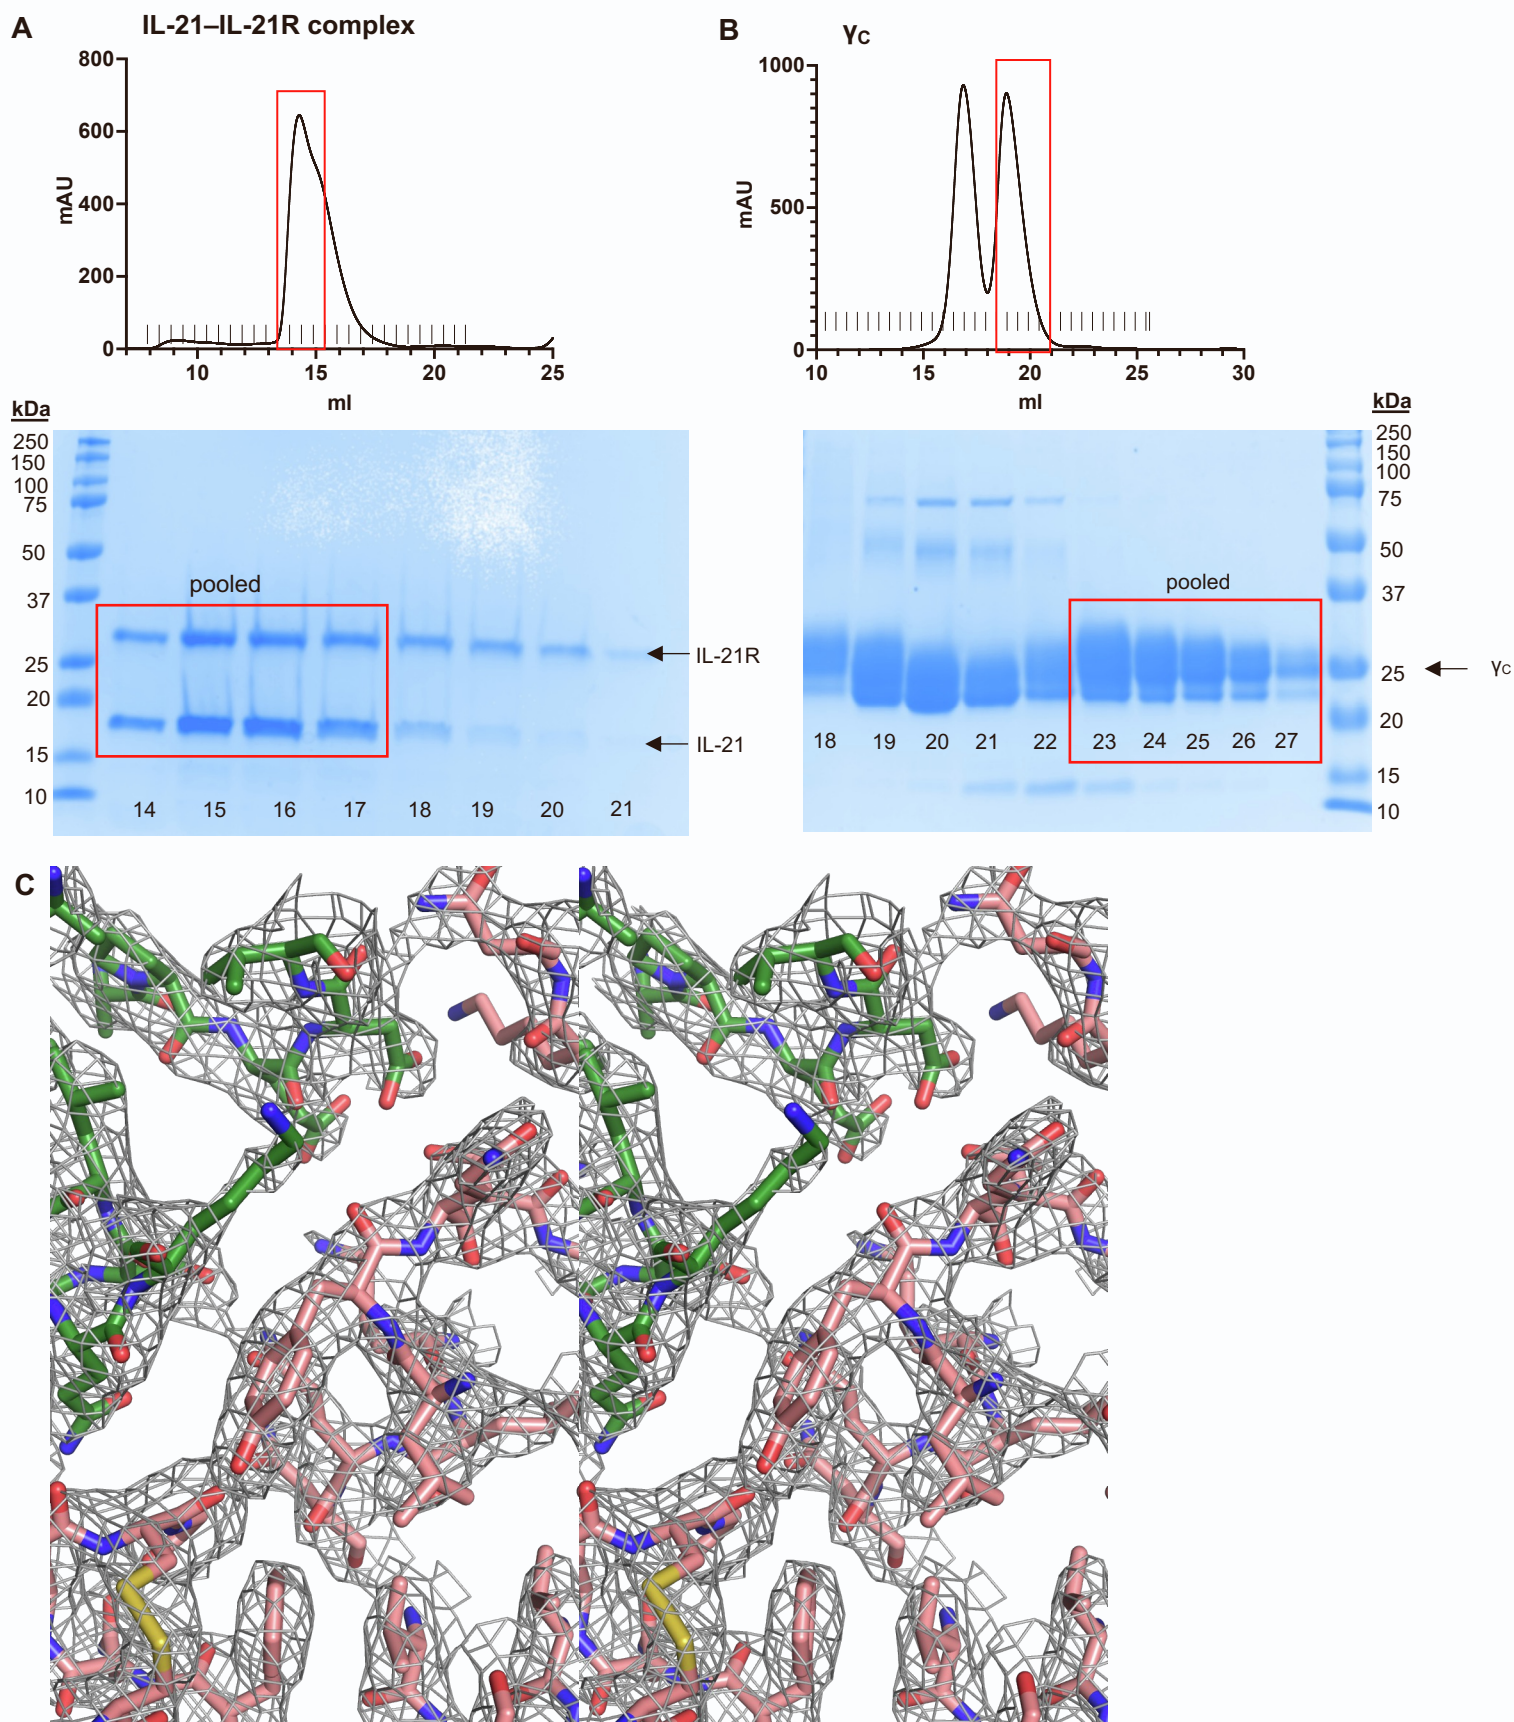

**Figure S1. Structure of the IL-21 receptor complex, related to Figure 1**

**(A–B)** Size exclusion chromatography UV traces for purified IL-21R and IL-21 (A) complex and  $\gamma_C$  (B) and accompanying Coomassie-stained SDS-PAGE gel. Fractions collected for crystallization trials are indicated in red. **(C)** Wall-eyed stereo view of site IIa interface. The final 2mFo-DFc map (shown in gray) is contoured at 1.0  $\sigma$ . IL-21 shown in green,  $\gamma_C$  in pink.

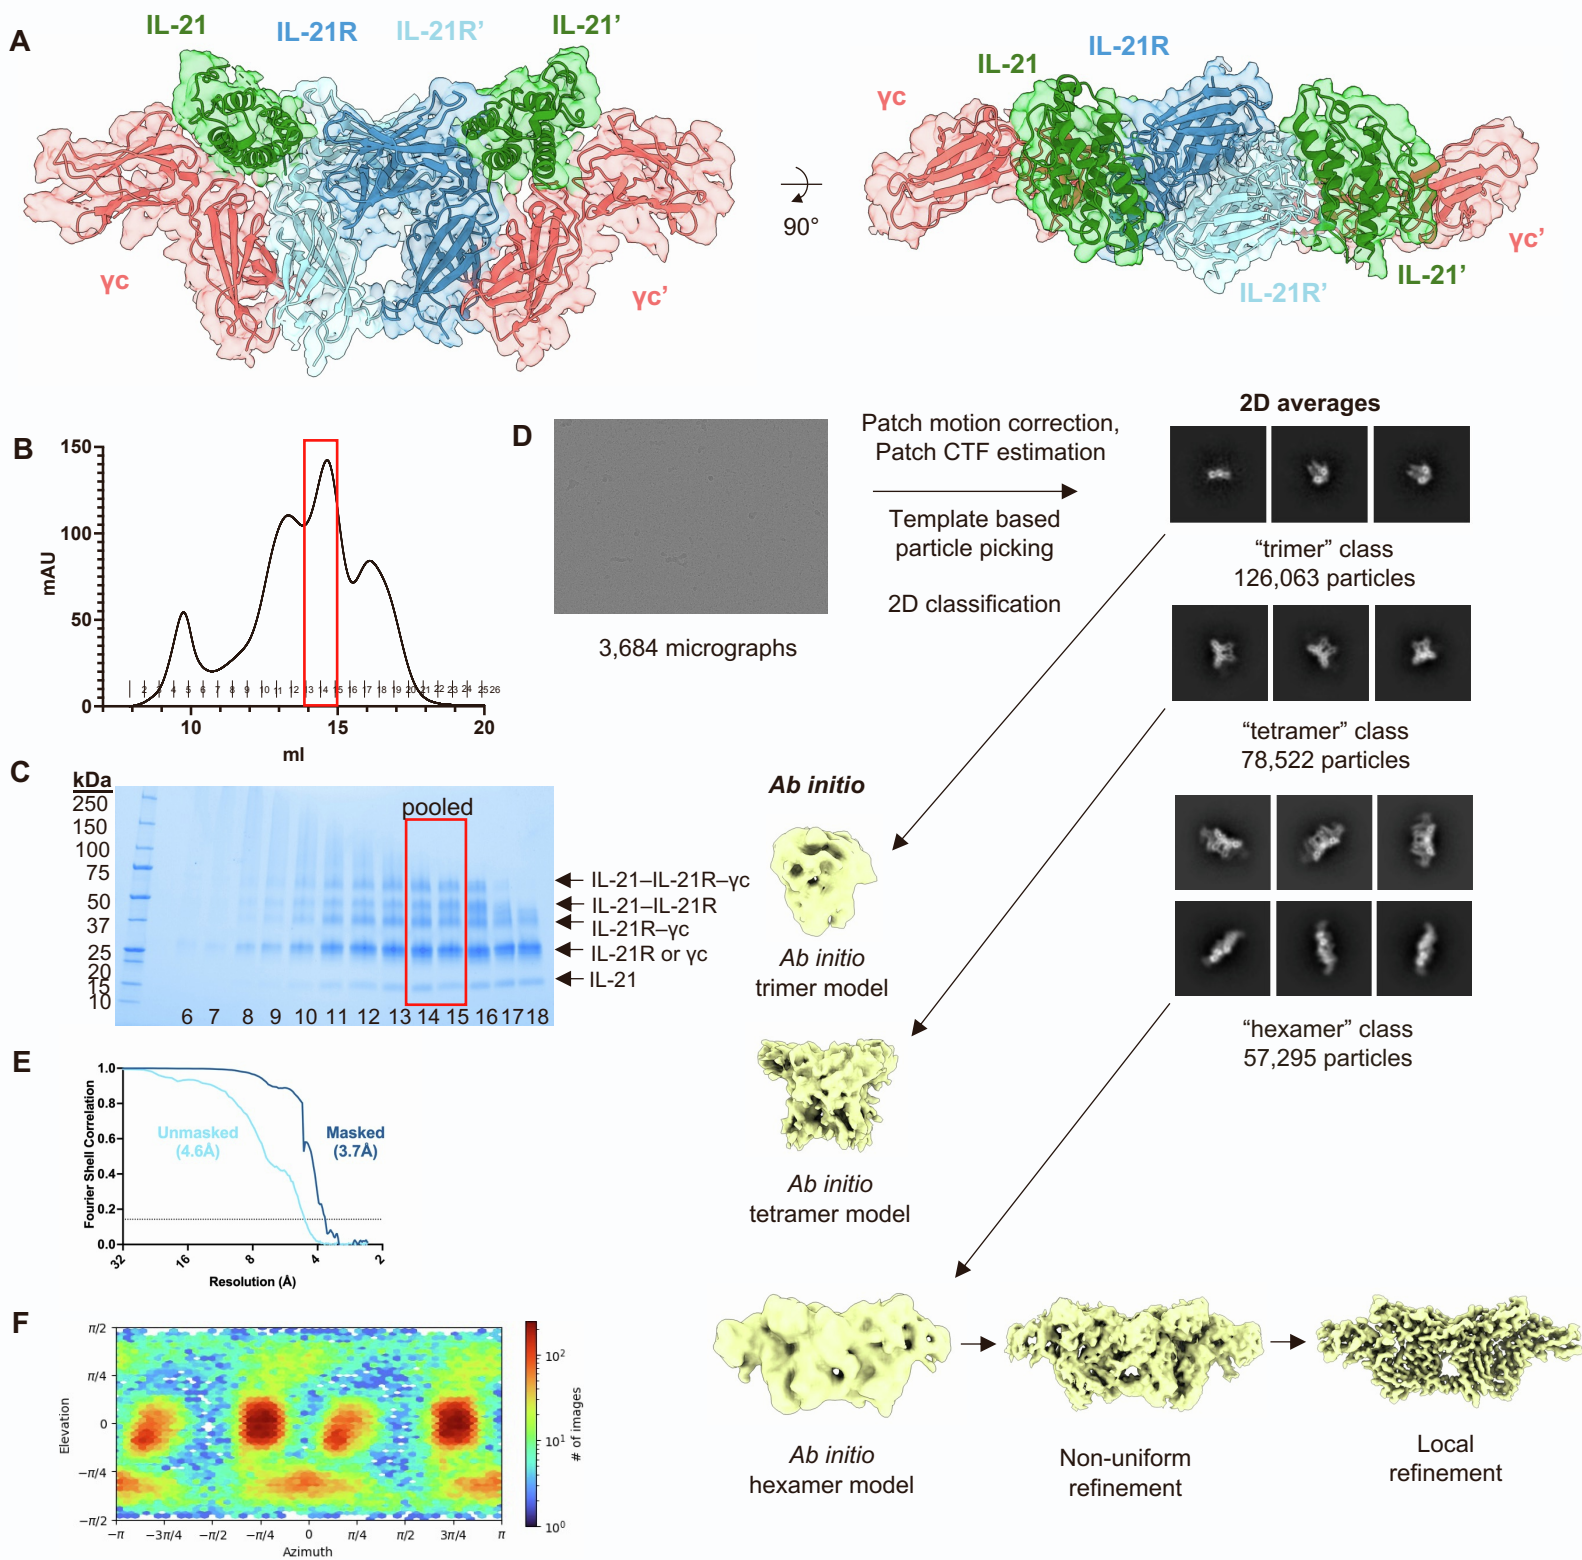

**Figure S2. Cryo-electron microscopy of the IL-21 complex, related to Figure 1**

**(A)** Final model of 2:2:2 IL-21:IL-21R:γ<sub>C</sub> complex determined by cryoEM (shown in transparency, EMD ID: EMD-28278) with crystallography model docked (shown as ribbon, PDB ID: 8ENT).

**(B–C)** Size exclusion chromatography UV trace for IL-21–IL-21R–γ<sub>C</sub> complex after BS<sup>3</sup> cross-linking and accompanying Coomassie-stained SDS-PAGE gel. Fractions collected for cryo-EM studies are outlined in red.

**(D)** Cryo-EM data processing of the IL-21 complex, including representative micrograph from data acquisition. 2D class averages for hexamer, tetramer, and trimer classes and *ab initio* models generated for each class, followed by refinement scheme for the hexameric model.

**(E)** Fourier shell correlation (FSC) curve of final model.

**(F)** Orientational distribution of the complex reconstruction.

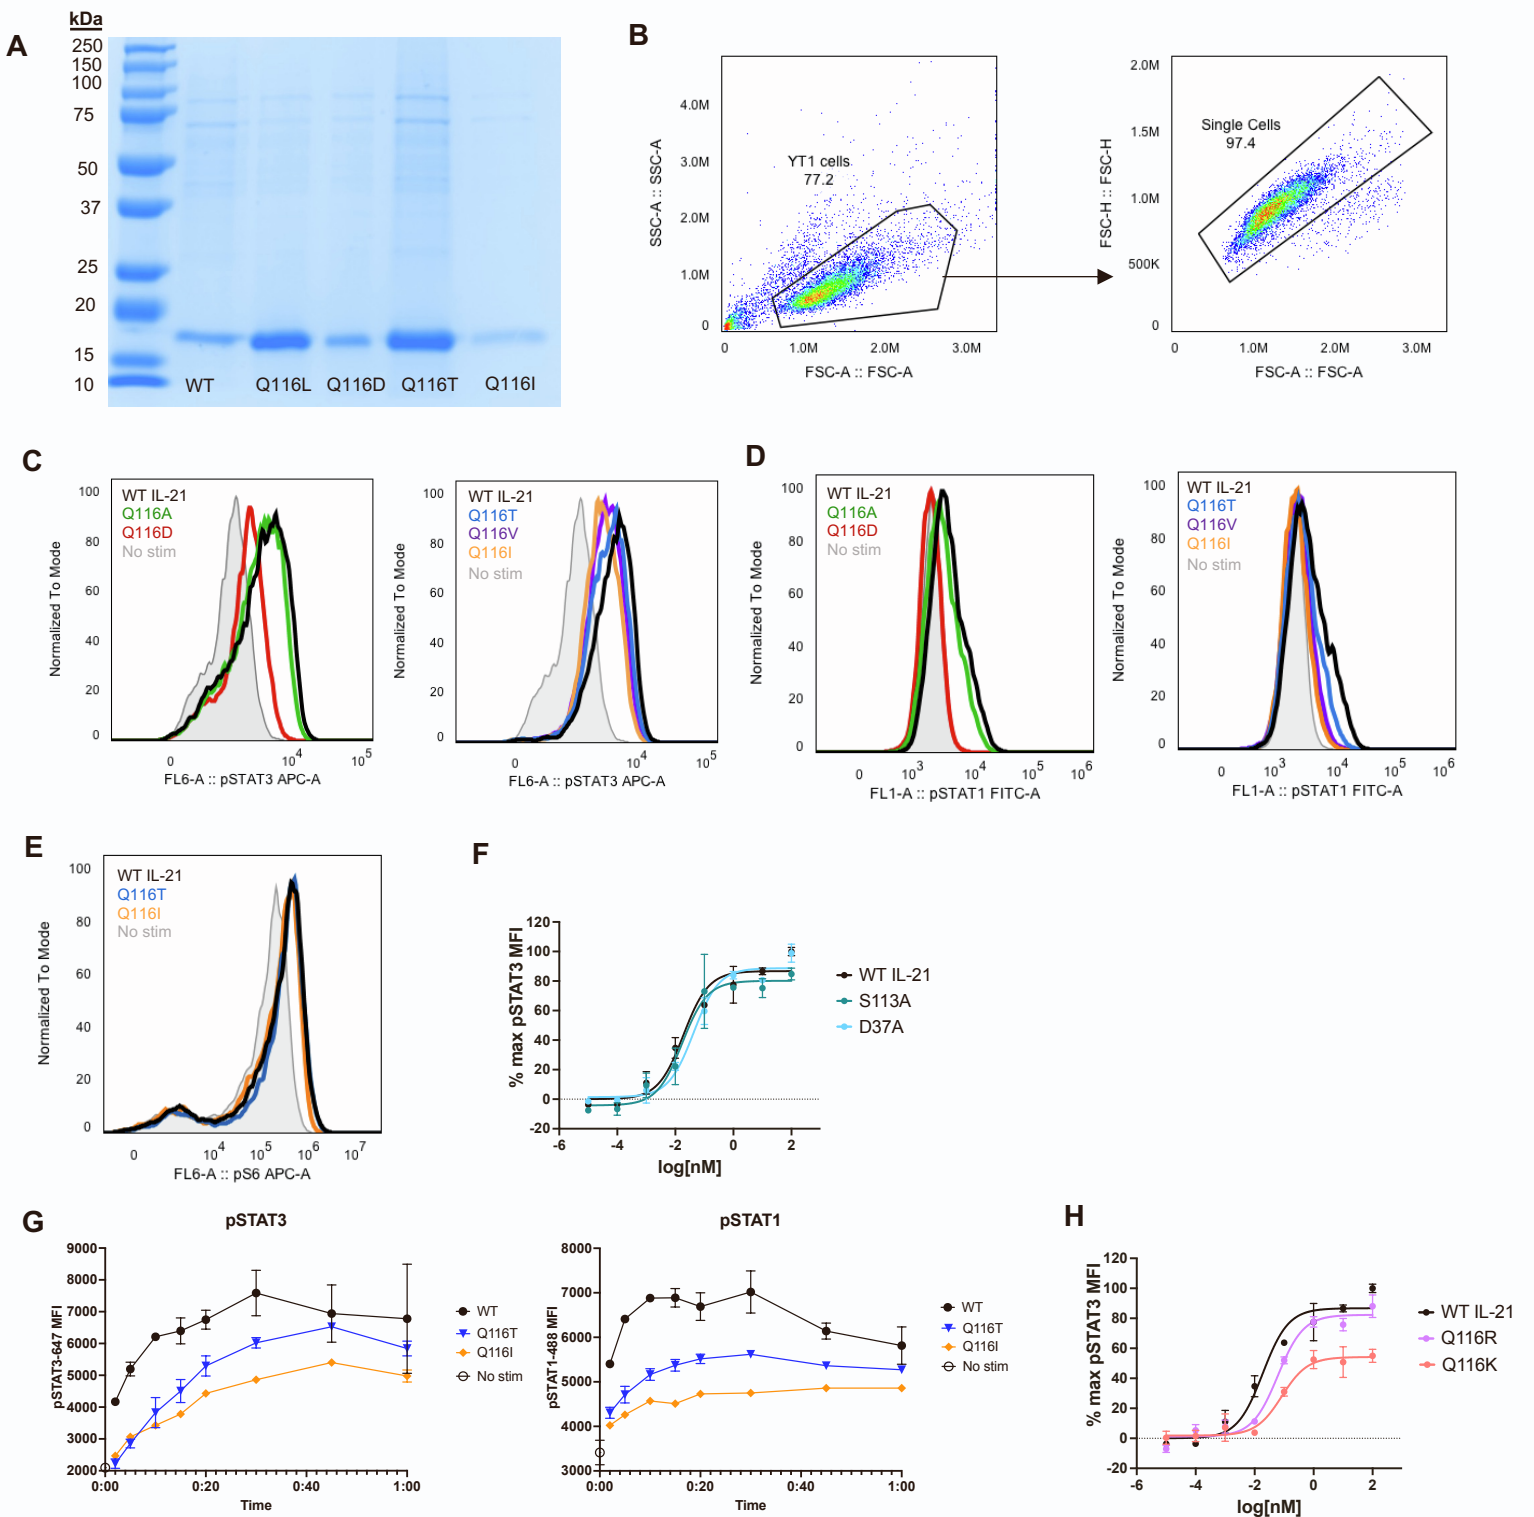

**Figure S3. Design of human IL-21 partial agonists, related to Figure 3**

(A) Coomassie-stained SDS-PAGE gel of His-tagged IL-21 variants purified by Ni-NTA.

(B) Representative gating on single Y116 cells.

(C–D) Representative histograms of pSTAT3 (C) or pSTAT1 (D) intensity in Y116 cell stimulated with wild-type IL-21 or variant.

(E) Representative histograms of pS6 intensity in Y116 cells stimulated with wild-type IL-21 or variant.

(F) Dose-response curves for phospho-STAT3 in Y116 cells stimulated with wild-type IL-21 or the indicated variants for 20 minutes and analyzed by flow cytometry. Data are mean  $\pm$  SD for two replicates, shown as percent of maximal wild-type IL-21 MFI.

(G) Time-course signaling assays for intracellular phospho-STAT3 and phospho-STAT1 in Y116 cells stimulated with 200nM IL-21 or variant for up to one hour. Data are mean  $\pm$  SD for two replicates.

(H) Dose-response curves for phospho-STAT3 in Y116 cells stimulated with wild-type IL-21 or the indicated variants for 20 minutes and analyzed by flow cytometry. Data are mean  $\pm$  SD for two replicates, shown as percent of maximal wild-type IL-21 MFI.

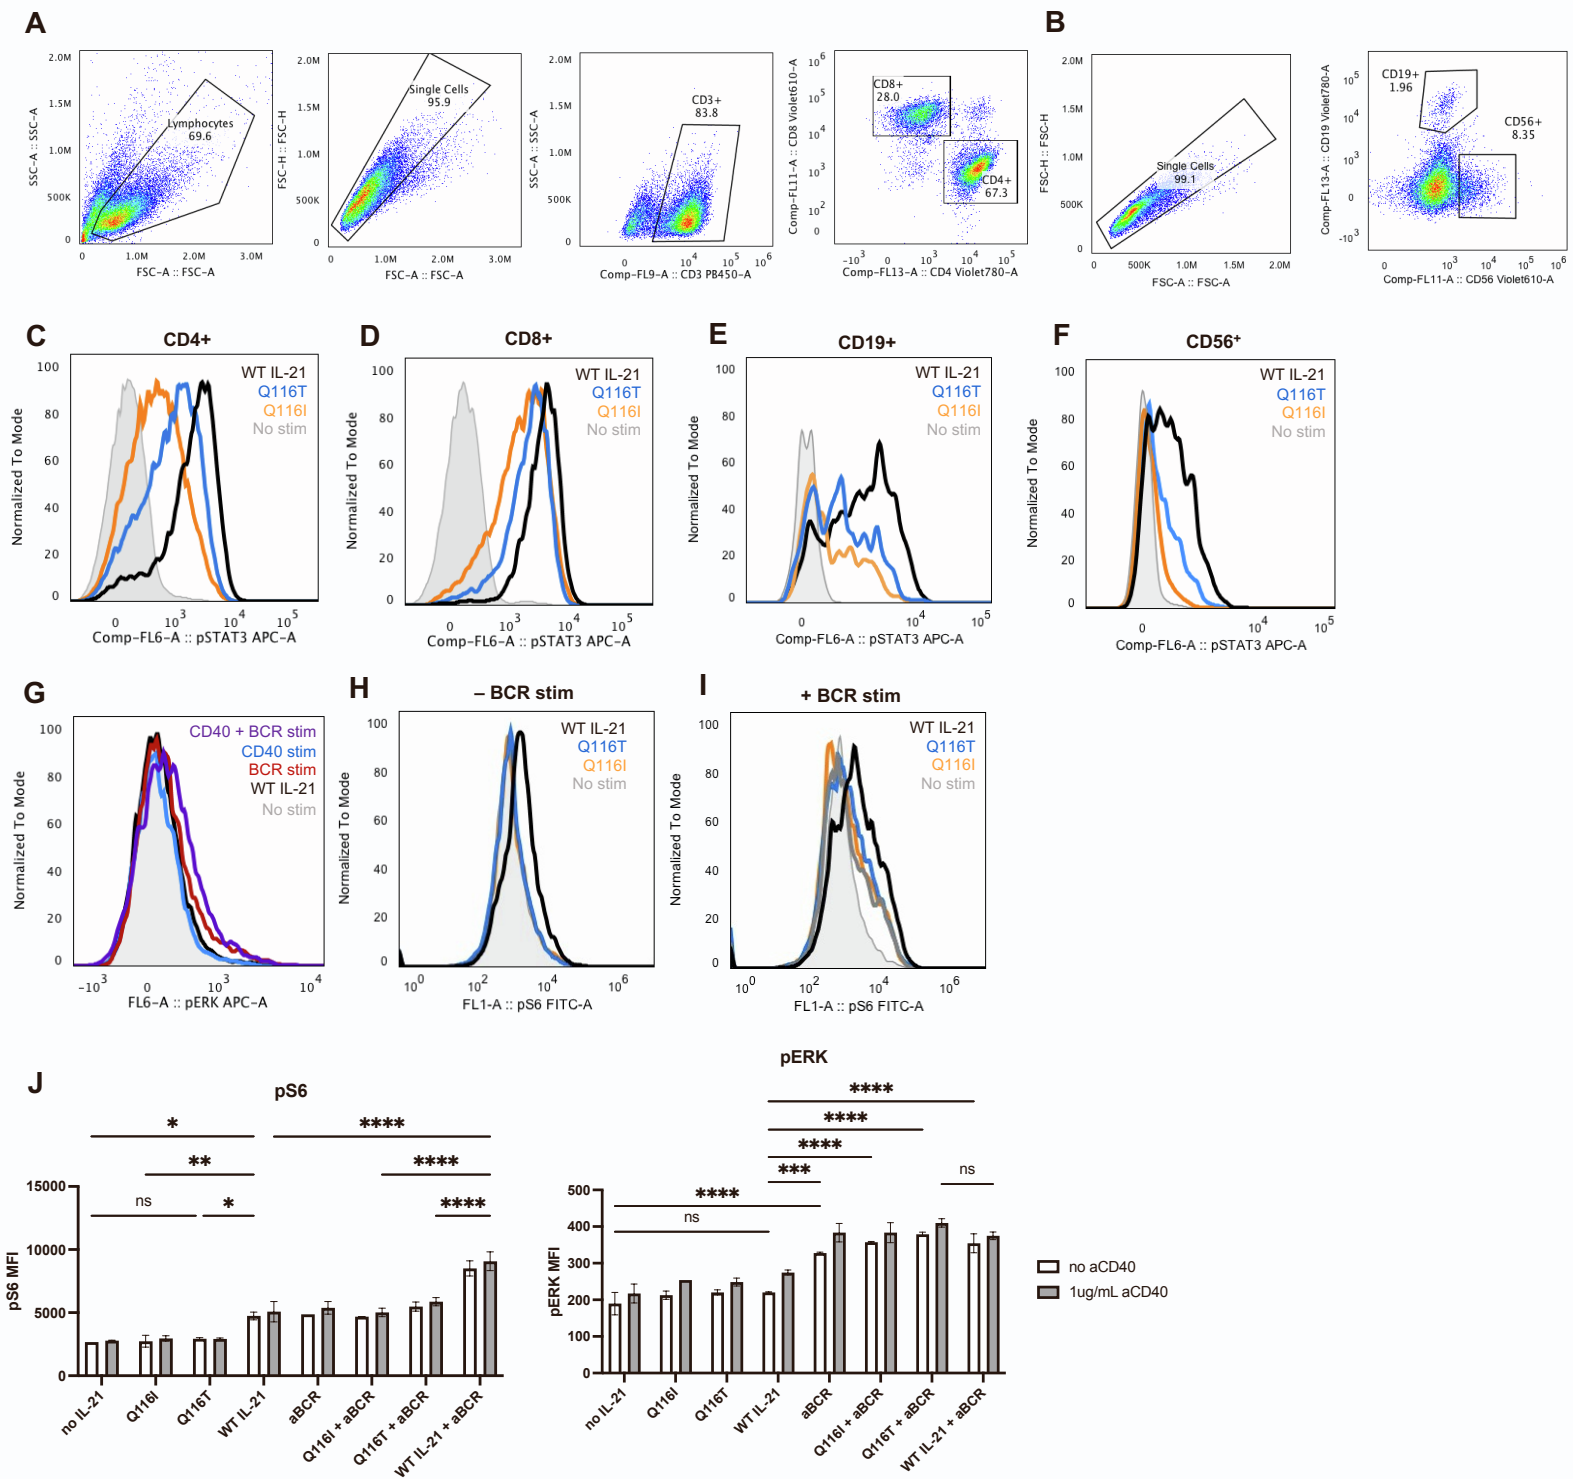

## Figure S4. IL-21 signaling in primary human cells

(A–B) Representative gating of primary CD4<sup>+</sup> and CD8<sup>+</sup> T cells (A) or CD19<sup>+</sup> and CD56<sup>+</sup> cells from bulk human peripheral mononuclear cells (B).

(C–F) Representative histograms of pSTAT3 intensity in CD4<sup>+</sup> (C), CD8<sup>+</sup> (D), CD19<sup>+</sup> (E) or CD56<sup>+</sup> (F) cells stimulated with wild-type IL-21, Q116T, Q116I, or no cytokine.

(G) Representative histograms of pERK intensity of MACS isolated CD19<sup>+</sup> cells stimulated with wild-type IL-21, BCR stimulation, or CD40 stimulation, corresponding to Figure 4B.

(H–I) Representative histograms of pS6 intensity of CD19<sup>+</sup> cells stimulated with wild-type IL-21, Q116T, Q116I, or no cytokine with (H) or without (I) BCR stimulation, corresponding to Figure 4C.

(J) Bar graphs quantifying mean intensity of pS6 and pERK in B cells detected by flow cytometry, corresponding to heat maps in Figure 4B–C (N=2 biological replicates, \* indicates  $P \leq 0.05$ , \*\* indicates  $P \leq 0.01$ , \*\*\* indicates  $P \leq 0.001$ , \*\*\*\* indicates  $P \leq 0.0001$  by two-way ANOVA).

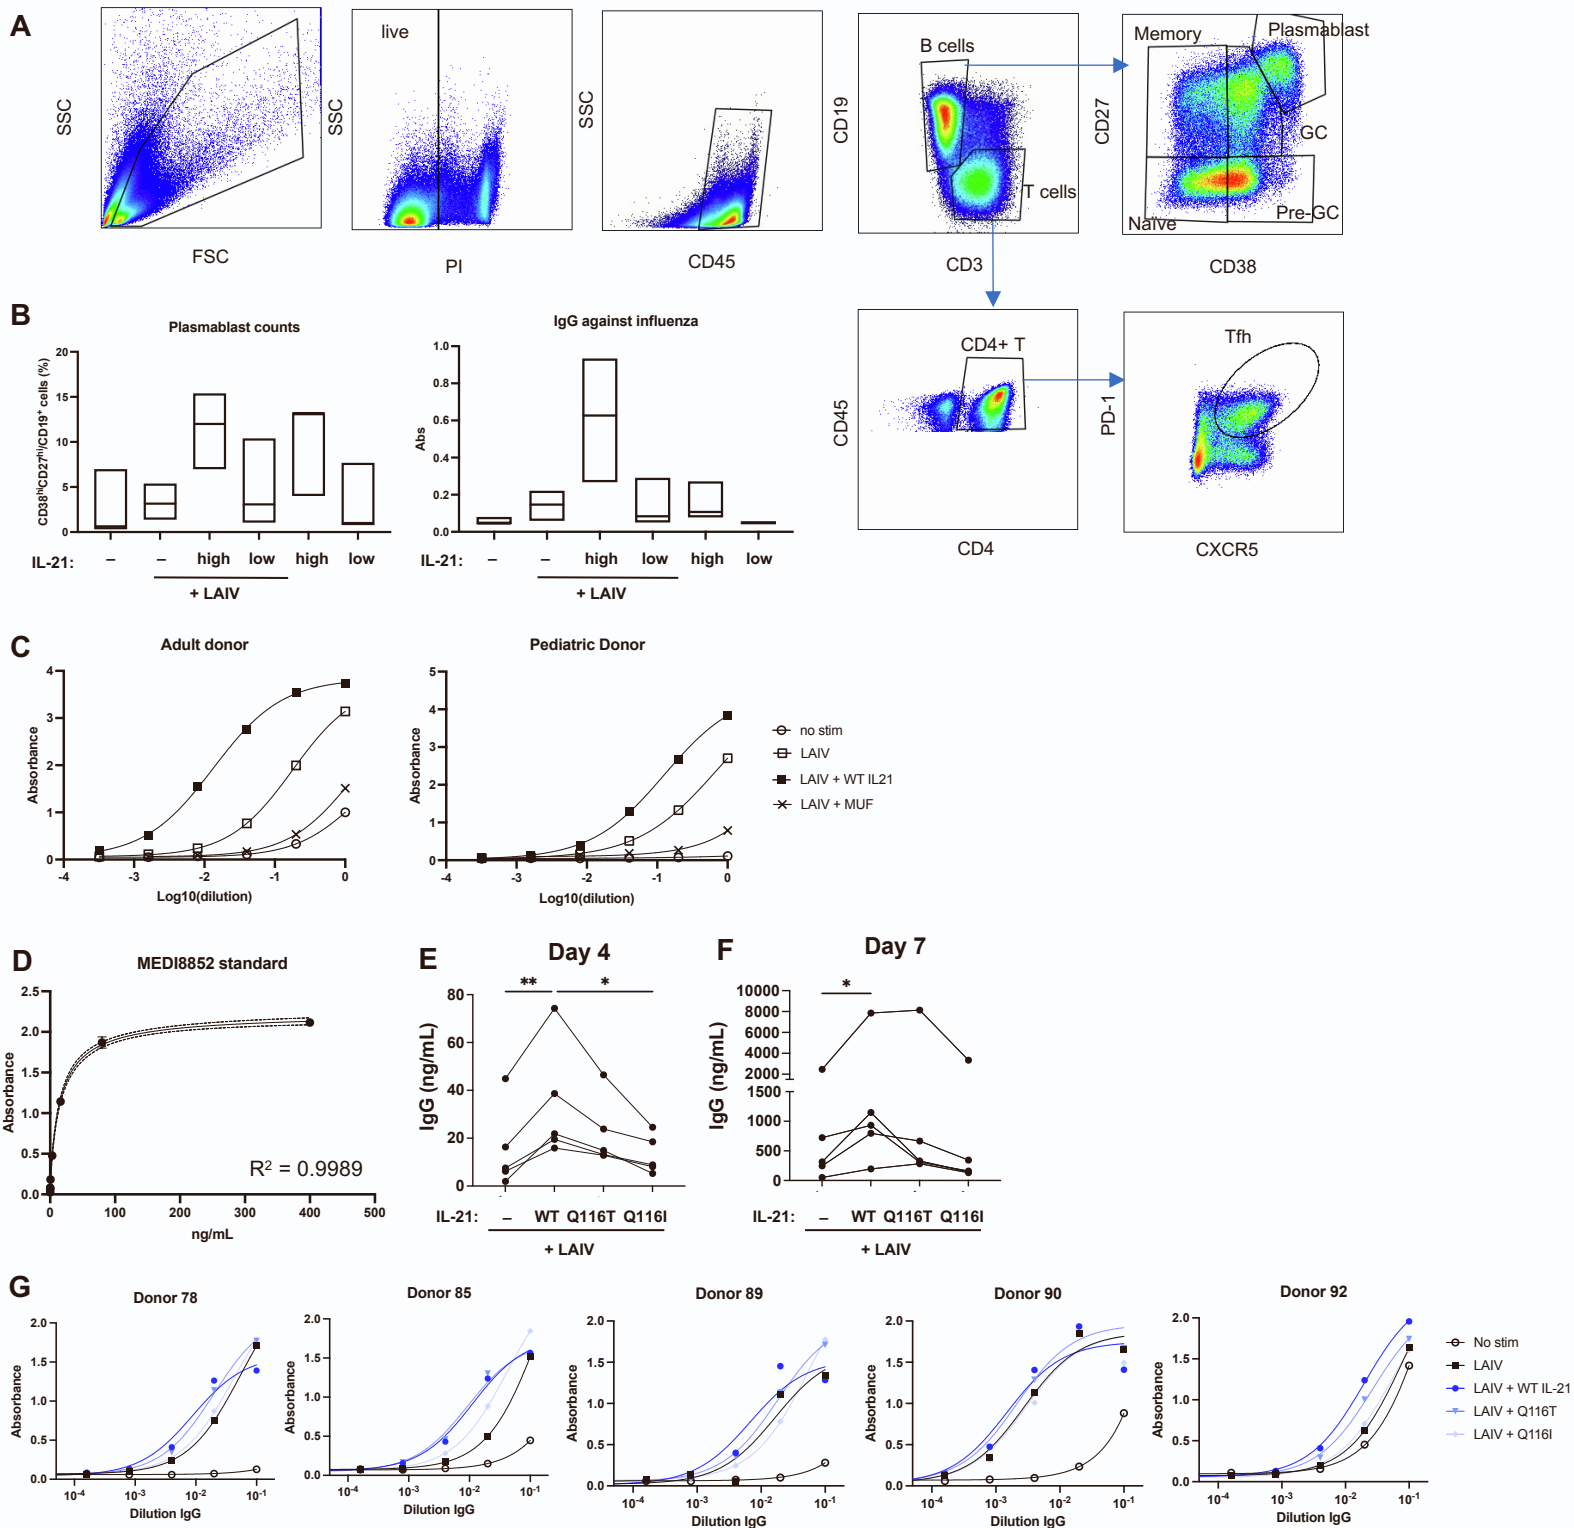

**Figure S5. Characterization of IL-21 response in human tonsil organoids, related to Figure 4**

**(A)** Representative gating of naïve B cells, memory B cells, germinal center B cells (GC), pre-germinal center B cells (pre-GC), plasmablasts, and T follicular helper (Tfh) cells in human tonsil organoids.

**(B)** Plasmablast frequency (% of total B cells) and flu-specific IgG detected by ELISA from tonsil organoids cultured for 7 days with or without live attenuated influenza virus (LAIV) and 50ng/ml (high dose) or 10ng/mL (low dose) IL-21 (N=3 human donors).

**(C)** Representative titrations of flu-specific IgG detected by ELISA in human tonsil organoids from an adult and pediatric donor.

**(D)** Representative standard curves derived from broadly neutralizing antibody MEDI8852 binding to whole flu used for quantification of flu-specific antibodies in human tonsil experiments.

**(E–F)** Flu-specific IgG quantified by ELISA from tonsil organoids vaccinated with LAIV and indicated IL-21 variant on day 4 (F) and day 7 (G). IgG was quantified using broadly neutralizing flu antibody. Raw IgG values plotted as ng/mL. \* indicates  $P \leq 0.05$ , \*\* indicates  $P \leq 0.01$  by ANOVA. (N=5 human donors.)

**(G)** Titrations of flu-specific IgG detected by ELISA in human tonsil organoids derived from 5 donors, stimulated with LAIV, wild-type IL-21, Q116T, or Q116I.

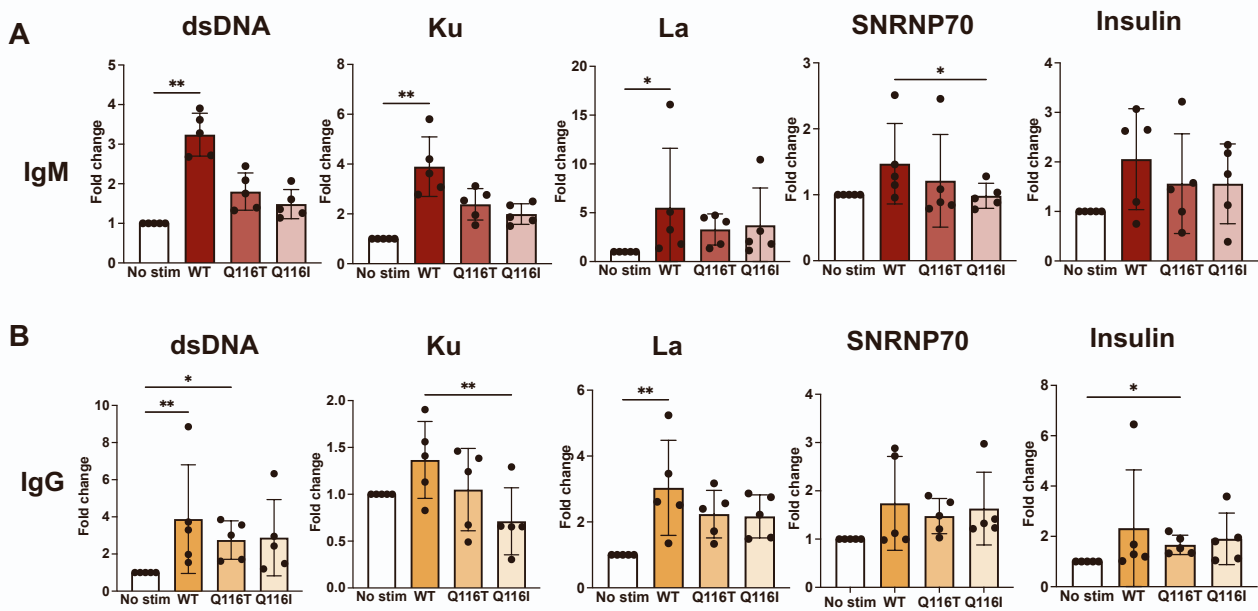

**Figure S6. Autoantibody production is modulated by IL-21 variants**

**(A–B)** IgM (A) and IgG (B) against self-antigens dsDNA, Ku and La, quantified by ELISA on day 7 in tonsils cultured with 100nM IL-21 or variant. Data are mean +/- SD for five human donors.

\* indicates  $P \leq 0.05$ , \*\* indicates  $P \leq 0.01$  by one-way ANOVA.

**Table S1. Data collection and refinement statistics, related to Figure 1**

| <b>Protein</b>                                                      | <b>IL-21-IL-21R-yc complex</b> |
|---------------------------------------------------------------------|--------------------------------|
| <b>PDB ID</b>                                                       | 8ENT                           |
| <b>Data collection</b>                                              |                                |
| <b>Wavelength</b>                                                   | 0.9795                         |
| <b>Resolution range (Å)</b>                                         | 48.17 - 2.831 (2.932 - 2.831)  |
| <b>Space group</b>                                                  | P1                             |
| <b>a, b, c (Å)</b>                                                  | 66.167 66.464 162.684          |
| <b><math>\alpha</math>, <math>\beta</math>, <math>\gamma</math></b> | 83.338 83.708 73.098           |
| <b>Total reflections</b>                                            | 211574 (20618)                 |
| <b>Unique reflections</b>                                           | 57754 (5757)                   |
| <b>Multiplicity</b>                                                 | 3.7 (3.6)                      |
| <b>Completeness (%)</b>                                             | 91.66 (88.39)                  |
| <b>Mean I/sigma</b>                                                 | 4.22 (0.66)                    |
| <b>R<sub>sym</sub></b>                                              | 0.2143 (1.636)                 |
| <b>R<sub>meas</sub></b>                                             | 0.2506 (1.914)                 |
| <b>R<sub>pim</sub></b>                                              | 0.1292 (0.9883)                |
| <b>CC<sub>1/2</sub></b>                                             | 0.985 (0.401)                  |
| <b>CC*</b>                                                          | 0.996 (0.757)                  |
| <b>Refinement</b>                                                   |                                |
| <b>Reflections used in refinement</b>                               | 57397 (5529)                   |
| <b>Reflections used for R-free</b>                                  | 1963 (194)                     |
| <b>R<sub>work</sub></b>                                             | 0.2784 (0.4586)                |
| <b>R<sub>free</sub></b>                                             | 0.3120 (0.4967)                |
| <b>Number of non-hydrogen atoms</b>                                 | 15852                          |
| <b>macromolecules</b>                                               | 15520                          |
| <b>ligands</b>                                                      | 277                            |
| <b>solvent</b>                                                      | 55                             |
| <b>Protein residues</b>                                             | 1888                           |
| <b>RMS(bonds) (Å)</b>                                               | 0.002                          |
| <b>RMS(angles) (°)</b>                                              | 0.6                            |
| <b>Ramachandran favored (%)</b>                                     | 94.72                          |
| <b>Ramachandran allowed (%)</b>                                     | 5.28                           |
| <b>Ramachandran outliers (%)</b>                                    | 0                              |
| <b>Rotamer outliers (%)</b>                                         | 3.76                           |
| <b>Clashscore</b>                                                   | 13.37                          |
| <b>Average B-factors:</b>                                           | 74.21                          |
| <b>macromolecules</b>                                               | 74.11                          |
| <b>ligands</b>                                                      | 84.98                          |
| <b>solvent</b>                                                      | 48.56                          |



**Table S2. Key contacts in IL-21 receptor complex**

| Site IIa<br>IL-21–IL-21R interface |                           |           |                           |
|------------------------------------|---------------------------|-----------|---------------------------|
| Hydrogen Bonds                     | $\gamma$ c                | Dist. [Å] | IL-21                     |
| 1                                  | F:THR 105 [O $\gamma$ ]   | 2.75      | D:ASP 37 [O $\delta$ ]    |
| 2                                  | F:GLN 127 [N $\epsilon$ ] | 3.12      | D:SER 113 [O $\gamma$ ]   |
| 3                                  | F:GLN 127 [O $\epsilon$ ] | 3.52      | D:GLN 116 [N $\epsilon$ ] |

| Site IIb<br>IL-21R– $\gamma$ c interface |                           |           |                           |
|------------------------------------------|---------------------------|-----------|---------------------------|
| Hydrogen Bonds                           | $\gamma$ c                | Dist. [Å] | IL-21R                    |
| 1                                        | F:ARG 183 [N $\eta$ ]     | 3.17      | E:GLU 136 [O $\epsilon$ ] |
| 2                                        | F:SER 146 [O $\gamma$ ]   | 2.81      | E:GLU 170 [O $\epsilon$ ] |
| 3                                        | F:GLN 147 [N $\epsilon$ ] | 2.77      | E:LEU 156 [O]             |
| 4                                        | F:SER 187 [O $\gamma$ ]   | 3.13      | E:SER 158 [O $\gamma$ ]   |
| 5                                        | F:SER 187 [O $\gamma$ ]   | 2.78      | E:LEU 156 [O]             |
| 6                                        | F:GLN 147 [O $\epsilon$ ] | 3.12      | E:LEU 156 [N]             |
| 7                                        | F:SER 187 [O $\gamma$ ]   | 3.72      | E:SER 158 [N]             |
| 8                                        | F:SER 190 [O $\gamma$ ]   | 2.83      | E:LEU 167 [N]             |
| 9                                        | F:TYR 182 [O $\eta$ ]     | 2.70      | E:LYS 134 [N $\zeta$ ]    |

| Site III<br>IL-21R–IL-21R interface |                           |           |                           |
|-------------------------------------|---------------------------|-----------|---------------------------|
| Hydrogen Bonds                      | IL-21R                    | Dist. [Å] | IL-21R                    |
| 1                                   | H:HIS 24 [N $\delta$ ]    | 3.20      | E:ASP 125 [O $\delta$ ]   |
| 2                                   | H:HIS 53 [N $\epsilon$ ]  | 2.43      | E:ASP 122 [O $\delta$ ]   |
| 3                                   | H:TRP 148 [N]             | 3.17      | E:ARG 144 [O]             |
| 4                                   | H:TRP 148 [N]             | 2.91      | E:ASP 146 [O]             |
| 5                                   | H:TRP 148 [N $\epsilon$ ] | 2.55      | E:GLU 178 [O $\epsilon$ ] |
| 6                                   | H:ALA 149 [N]             | 2.90      | E:ARG 144 [O]             |
| 7                                   | H:THR 61 [O $\gamma$ ]    | 2.92      | E:HIS 63 [N $\epsilon$ ]  |
| 8                                   | H:ASP 122 [O $\delta$ ]   | 2.70      | E:HIS 53 [N $\epsilon$ ]  |
| 9                                   | H:ASP 125 [O $\delta$ ]   | 3.00      | E:HIS 24 [N $\delta$ ]    |
| 10                                  | H:ARG 144 [O]             | 3.10      | E:TRP 148 [N]             |
| 11                                  | H:ARG 144 [O]             | 2.67      | E:ALA 149 [N]             |
| 12                                  | H:ASP 146 [O]             | 2.73      | E:TRP 148 [N]             |
| 13                                  | H:GLU 178 [O $\epsilon$ ] | 2.77      | E:TRP 148 [N $\epsilon$ ] |

| Site III<br>IL-21R–IL-21R interface |                          |           |                          |
|-------------------------------------|--------------------------|-----------|--------------------------|
| Salt Bridges                        | IL-21R                   | Dist. [Å] | IL-21R                   |
| 1                                   | H:HIS 24 [N $\delta$ ]   | 3.20      | E:ASP 125 [O $\delta$ ]  |
| 2                                   | H:HIS 53 [N $\epsilon$ ] | 2.43      | E:ASP 122 [O $\delta$ ]  |
| 3                                   | H:ASP 122 [O $\delta$ ]  | 2.70      | E:HIS 53 [N $\epsilon$ ] |
| 4                                   | H:ASP 122 [O $\delta$ ]  | 2.95      | E:HIS 53 [N $\epsilon$ ] |
| 5                                   | H:ASP 125 [O $\delta$ ]  | 3.00      | E:HIS 24 [N $\delta$ ]   |

**Table S3. Cryo-EM data collection, refinement, and validation statistics**

| <b>Protein</b>                               | <b>IL-21-IL-21R-<math>\gamma</math>c complex</b> |
|----------------------------------------------|--------------------------------------------------|
| <b>EMD</b>                                   | EMD-28278                                        |
| <b><u>Data collection and processing</u></b> |                                                  |
| Magnification                                | 45,000                                           |
| Voltage (keV)                                | 200                                              |
| Electron exposure (e-/Å <sup>2</sup> )       | 50                                               |
| Defocus range (μm)                           | -1.0 to -2.5                                     |
| Pixel size (Å)                               | 1.15                                             |
| Symmetry imposed                             | C2                                               |
| Initial particle images                      | 1,444,277                                        |
| Final particle images                        | 57,295                                           |
| Map resolution FSC threshold (Å)             | 0.143                                            |
| Map resolution (Å)                           | 3.7                                              |
| <b><u>Model Fitting</u></b>                  |                                                  |
| Model used (PDB)                             | 8ENT                                             |
| Model resolution FSC threshold (Å)           | 0.5                                              |
| Model resolution (Å)                         | 4.2                                              |
